# Supplementary material
Source: PubMed Central journal article supplement (PMC9189574)
Supplement: sj-pdf-1-ajl-10.1177_1559827620949205.pdf [file sj-pdf-1-ajl-10.1177_1559827620949205.pdf]

TABLE 1S: Children (n=196) of participants on WFPB lifestyle program.

| Children (n, (%))                       |            |
|-----------------------------------------|------------|
| Underage (<18 years)                    | 118 (60.0) |
| on WFPB diet                            | 101 (85.6) |
| Adult (>18 years)                       | 78 (40.0)  |
| on WFPB diet                            | 22 (28.2)  |
| Born to parents while on WFPB lifestyle | 16 (8.2)   |

Whole-food plant-based (WFPB).

TABLE 2S: Baseline vs. current obesity indices (BMI, body mass (MB), body fat (BF) % and BMI classification) of all participants on the WFPB lifestyle program from 0.5–10 years.

| Parameter                       | N   | Baseline BMI | Current BMI | Change     | P-value | Baseline BM | Current BM  | Change      | P-value | Baseline BF | Current BF | Change     | P-value |
|---------------------------------|-----|--------------|-------------|------------|---------|-------------|-------------|-------------|---------|-------------|------------|------------|---------|
| All participants                | 151 |              |             |            |         |             |             |             |         |             |            |            |         |
| BMI (kg/m <sup>2</sup> )        |     | 26.4 ± 5.6   | 23.9 ± 3.8  | -2.5 ± 2.8 | <.001   |             |             |             |         |             |            |            |         |
| BM (kg)                         |     |              |             |            |         | 75.8 ± 18.6 | 68.7 ± 14.0 | -7.1 ± 8.3  | <.001   |             |            |            |         |
| BF %                            |     |              |             |            |         |             |             |             |         | 28.7 ± 9.2  | 22.3 ± 7.3 | -6.4 ± 5.6 | <.001   |
| According to BMI classification |     |              |             |            |         |             |             |             |         |             |            |            |         |
| Normal weight (BMI 18.5–24.9)   | 75  | 22.4 ± 1.7   | 21.5 ± 1.8  | -0.9 ± 1.5 | <.001   | 63.5 ± 8.4  | 61.0 ± 9.4  | -2.5 ± 4.5  | <.001   | 24.3 ± 7.0  | 19.5 ± 5.9 | -4.8 ± 5.3 | <.001   |
| Overweight (BMI 25–29.9)        | 36  | 26.9 ± 1.4   | 24.5 ± 1.5  | -2.4 ± 1.8 | <.001   | 79.4 ± 9.6  | 72.2 ± 8.9  | -7.2 ± 5.4  | <.001   | 28.2 ± 8.1  | 21.6 ± 7.0 | -6.6 ± 4.6 | <.001   |
| Obesity (BMI ≥ 30)              | 39  | 34.0 ± 4.7   | 28.3 ± 3.9  | -5.6 ± 2.9 | <.001   | 97.0 ± 18.8 | 80.9 ± 15.2 | -16.1 ± 8.8 | <.001   | 38.1 ± 6.7  | 28.6 ± 6.4 | -9.5 ± 5.7 | <.001   |

Data are mean ± standard deviation (SD). BMI classifications by the World Health Organization. <sup>1</sup>One participants was underweight (with normal BF % and MMI) and therefore not include it into normal weight category. A t-test was used for dependent samples.
